# Supplementary material for: Austria’s Digital Vaccination Registry: Stakeholder Views and Implications for Governance
Source: MDPI journal article supplement (doi:10.3390/vaccines9121495), 2021-12-17
Supplement: s1 [file s1]

**Table S1.** List of interviews.

| ITV no. | Date (dd/mm/yy) | Information on interviewee                         |
|---------|-----------------|----------------------------------------------------|
| 1       | 28.10.20        | Senior Policy Official                             |
| 2       | 14.01.21        | Senior Policy Official                             |
| 3       | 02.02.21        | IT Expert                                          |
| 4       | 08.02.21        | Senior Policy Official                             |
| 5       | 17.02.21        | Senior Policy Official                             |
| 6       | 18.02.21        | IT and EHR Expert                                  |
| 7       | 17.03.21        | Senior Medical Official                            |
| 8       | 2018            | Senior Public Health Official, federal state 1 (W) |
| 9       | 2018            | Senior Public Health Official, federal state 2 (S) |
| 10      | 2018            | Senior Public Health Official, federal state 3 (N) |
| 11      | 2018            | Data Administrator, federal state (N)              |
| 12      | 21.02.18        | Senior Immunologist, Medical University            |
| 13      | 06.03.18        | Senior Epidemiologist                              |
| 14      | 23.05.18        | Senior Public Health Official, federal state 4     |
| 15      | 24.05.18        | Senior Statistician                                |
| 16      | 30.01.19        | Senior Statistician (academic)                     |
